# Supplementary figures and images for: Bivalent therapeutic vaccine against HPV16/18 genotypes consisting of a fusion protein between the extra domain A from human fibronectin and HPV16/18 E7 viral antigens
Source: PubMed Central journal article supplement — J Immunother Cancer. 2020 Jun 24;8(1):e000704. doi: 10.1136/jitc-2020-000704 (PMC7319778; doi:10.1136/jitc-2020-000704), 2020-06-24

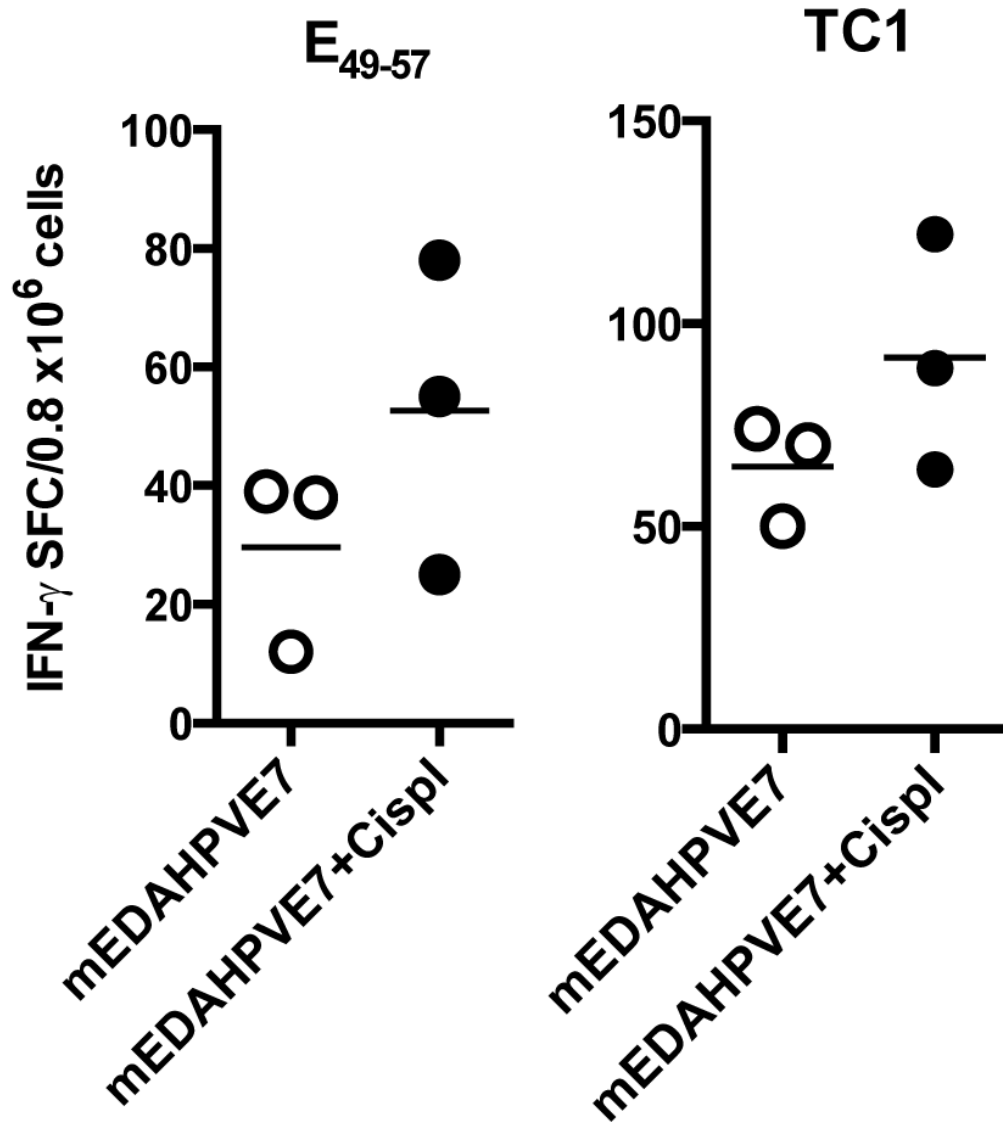

Supplement: jitc-2020-000704supp001.pdf [file jitc-2020-000704supp001.pdf]

A

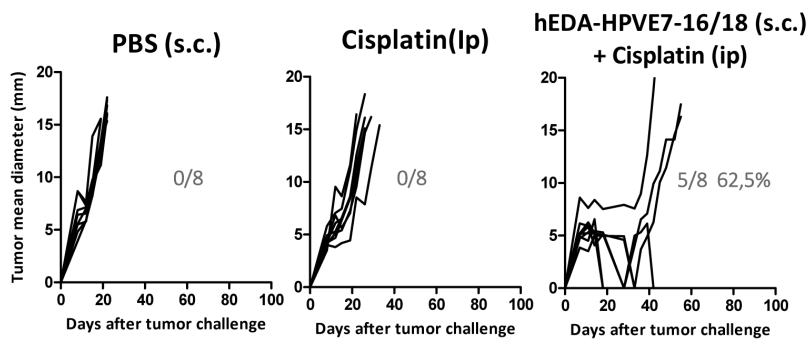

B

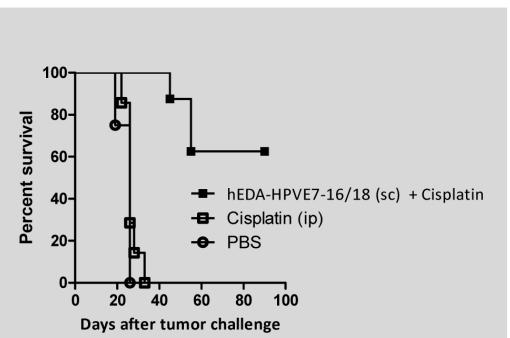

Supplement: jitc-2020-000704supp002.pdf [file jitc-2020-000704supp002.pdf]
